# Supplementary material for: Effects of iodine intake on gut microbiota and gut metabolites in Hashimoto thyroiditis-diseased humans and mice
Source: PubMed Central journal article supplement (PMC10824742; doi:10.1038/s42003-024-05813-6), 2024-01-29
Supplement: 42003_2024_5813_MOESM1_ESM.pdf [file 42003_2024_5813_MOESM1_ESM.pdf]

**Supplementary information for**  
**Effects of iodine intake on gut microbiota and gut metabolites in**  
**Hashimoto thyroiditis-diseased humans and mice**

**Authors:**

Boshen Gong<sup>1#</sup>, Fanrui Meng<sup>1#</sup>, Xichang Wang<sup>1</sup>, Yutong Han<sup>1</sup>, Wanyu Yang<sup>1</sup>,  
Chuyuan Wang<sup>1\*</sup> Zhongyan Shan<sup>1\*</sup>

**Affiliations:**

<sup>1</sup>Department of Endocrinology and Metabolism, The First Affiliated Hospital of China  
Medical University, China Medical University, Shenyang, China.

**#These authors contributed equally.**

**\*Corresponding author:**

**Zhongyan Shan**

Email: shanzhongyan@medmail.com.cn

**Chuyuan Wang**

Email: Chuyuan0215@163.com

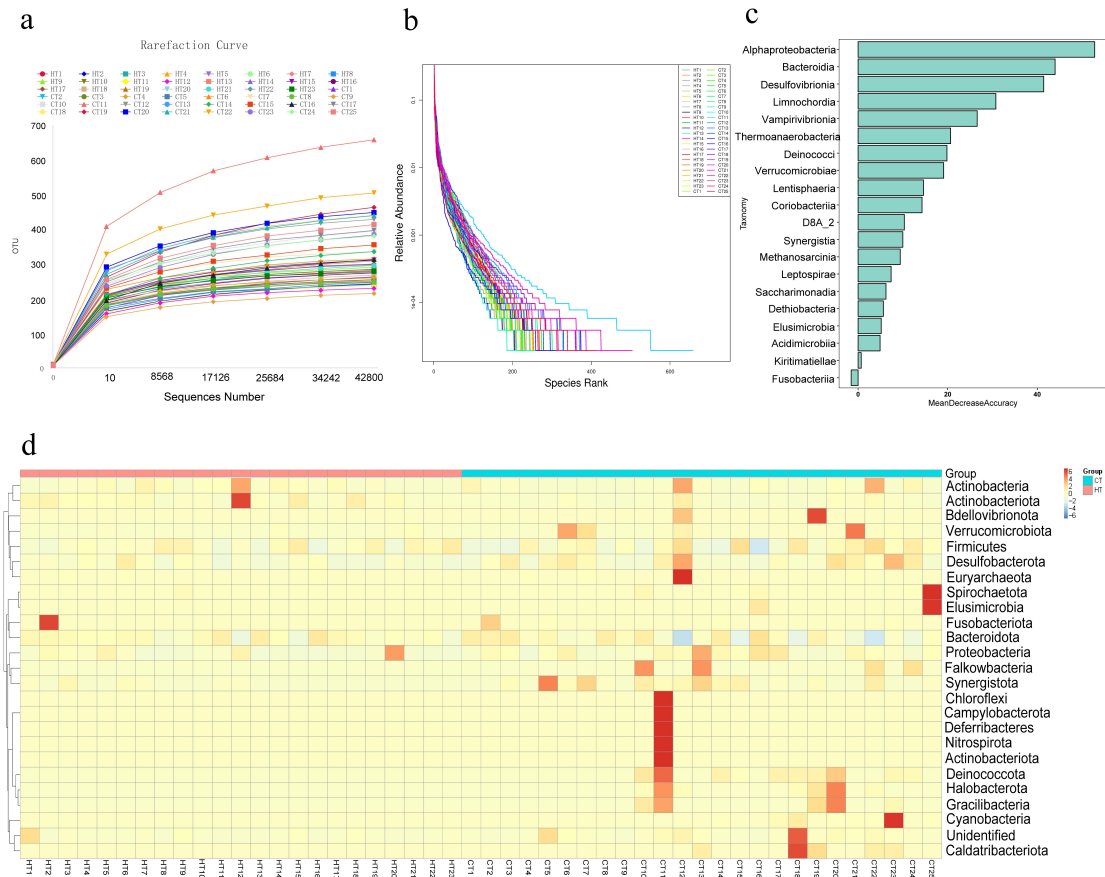

**Fig S1. a)** Rarefaction curves of the gut microbiota at the OTU level. **b)** Rank-abundance curves of the gut microbiota at the OTU level. **c)** Random Forests analysis of gut microbiota. The genus level of bacteria could significantly discriminate between HT patients and healthy control were presented in descending order. **d)** Heatmap of the relative abundances of microbiota at the phylum level in HT and control groups. The color bar indicates the Z score, which represents the relative abundance. Z score  $<$  ( $>$  0) illustrates that the relative abundance was lower (higher) than the mean.

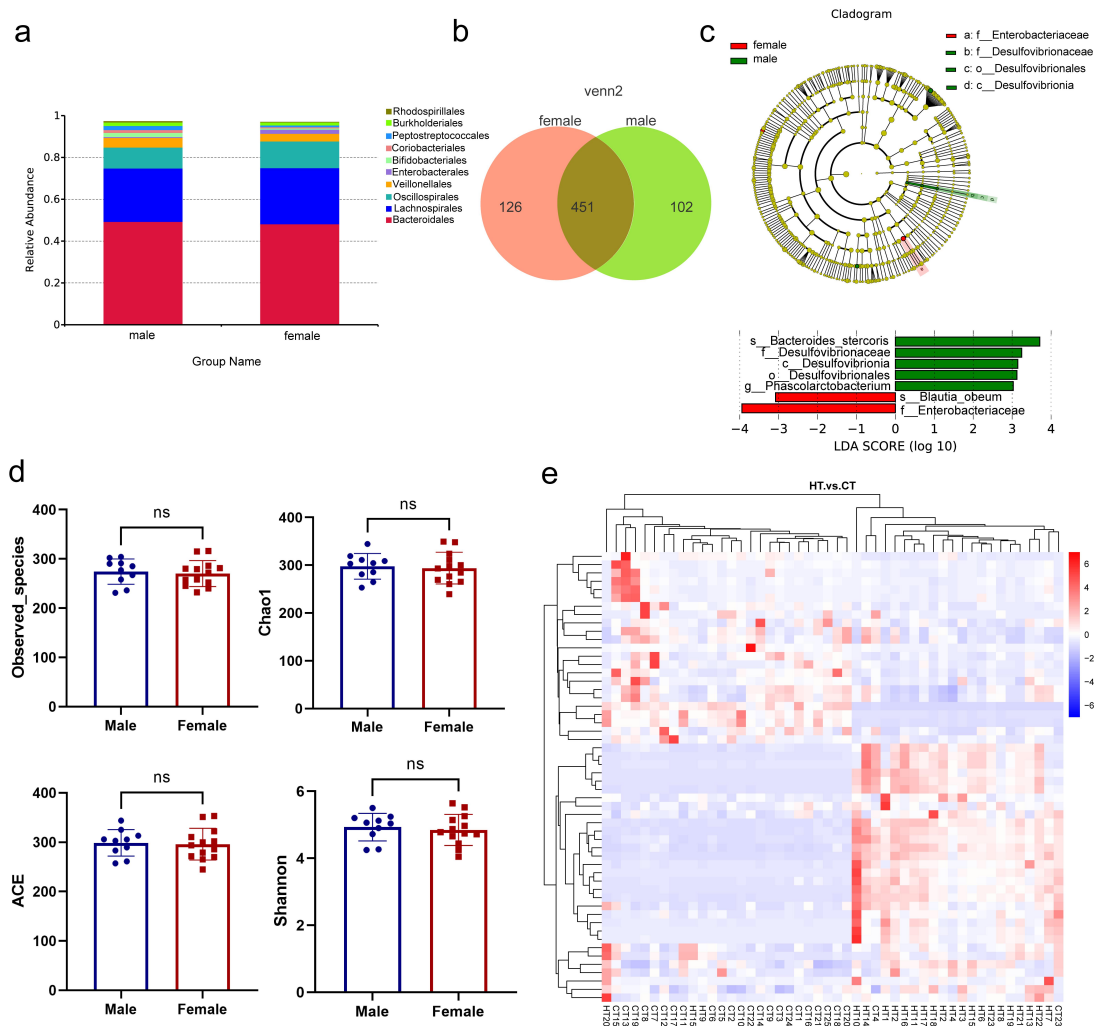

**Fig S2. a)** Order level comparison of fecal microbiota between male and female groups with HT. (N=10 for male group, and 13 for female group). **b)** The Venn diagram illustrates the overlap of OTUs in gut microbiota between different sex groups with HT. **c)** Cladogram generated using LEfSe analysis. LDA scores of the microbiota between two sex groups at different taxonomic levels using LEfSe analysis. LDA score  $>3$  or  $<-3$  represents bacteria taxa that are significantly enriched ( $P < 0.05$ ). **d)** The  $\alpha$  diversity indices of the microbiota between male and female groups with HT. **e)** Heatmap of the differentially expressed metabolites, which

significantly changed in the HT group. The color bar indicates the Z score, which represents the relative abundance. Z score <0 (>0) meant the relative abundance was lower (higher) than the mean.

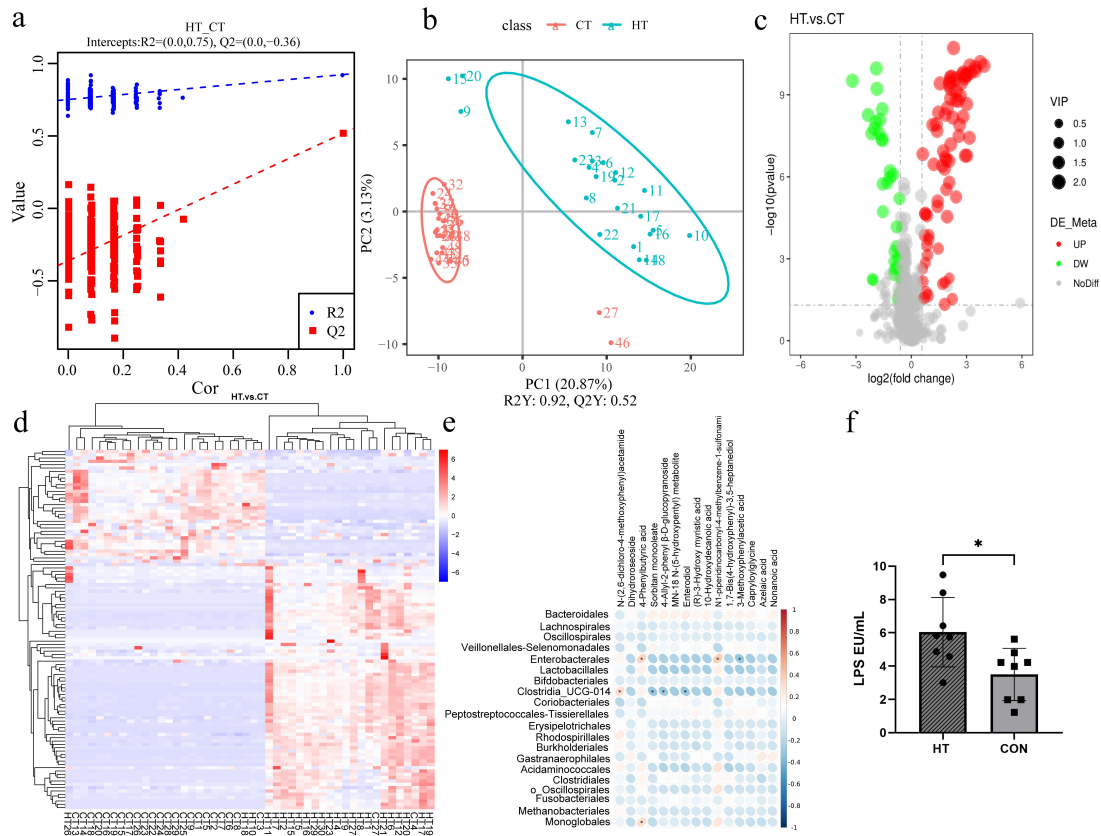

**Fig S3. a)** The permutation test between the control and HT groups (positive mode). **b)** PLS-DA between the control and HT groups (positive mode). **c)** Volcano map of the metabolites screened between the HT and control groups of positive mode. **d)** Heatmap of the differentially expressed metabolites which significantly changed in HT group of positive mode (corrected  $P < 0.05$  by t-test). The color bar indicates Z score, which represents the relative abundance. Z score <0 (>0) meant the relative abundance was lower (higher) than the mean. **e)** Heatmap of correlations between the significantly changed gut microbiota and 15 metabolites in patients with HT. The color bar with numbers indicates the correlation coefficients. **f)** Serum levels of LPS

in mice with HT and healthy control group. The t-test was used to detect significant differences between two groups. \* $P < 0.05$ .  $N = 8$  in each group.

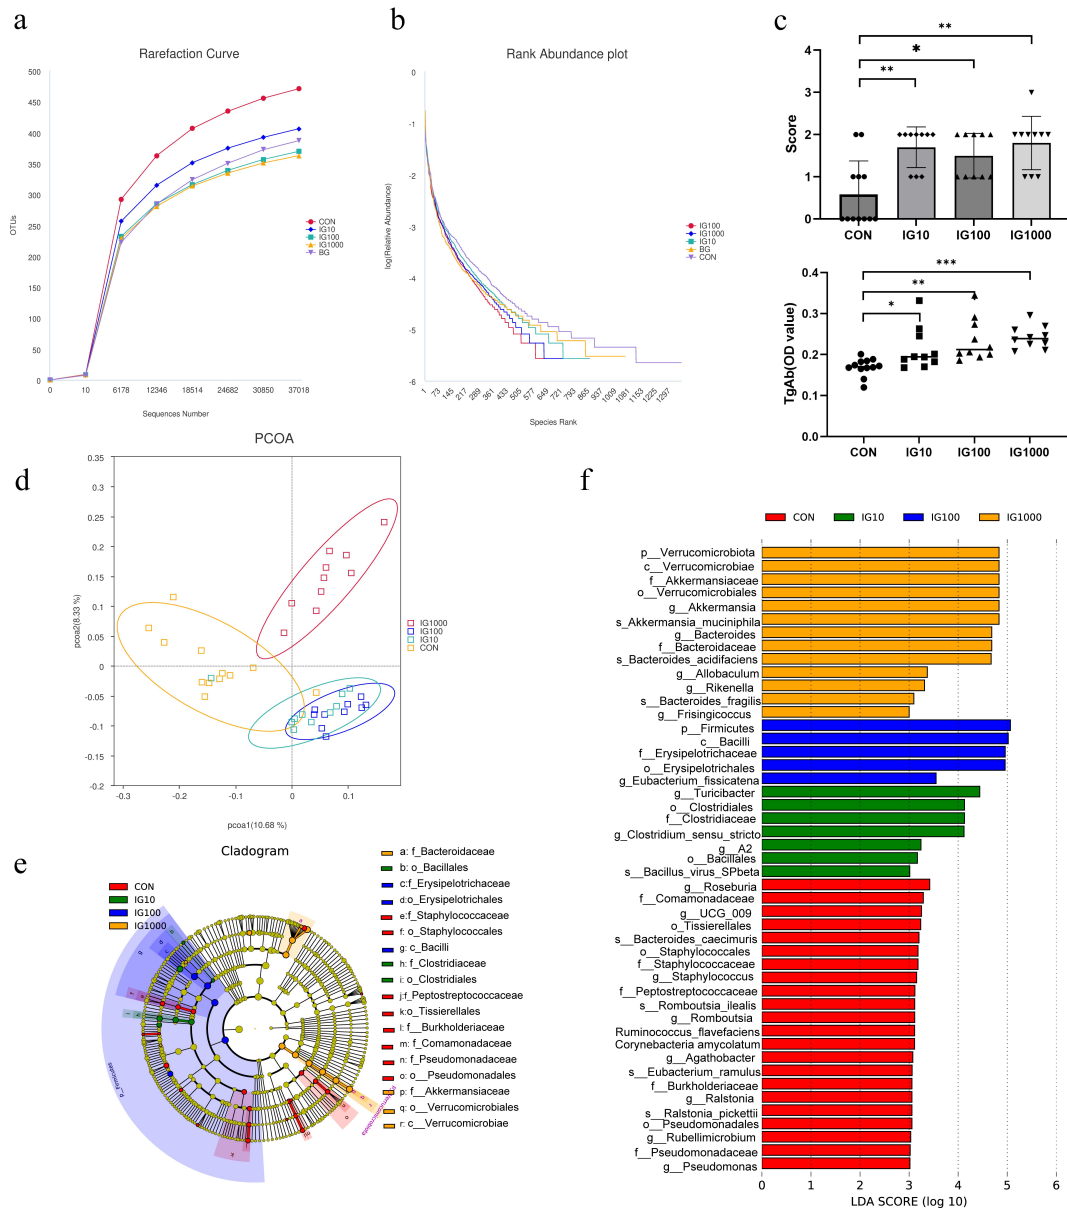

**Fig S4.** a) Rarefaction curves of the gut microbiota at the OTU level. b) Rank-abundance curves of the gut microbiota at the OTU level. c) The scoring of lymphocyte infiltration of thyroid gland serum. Serum TgAb concentrations were determined using ELISA. The Kruskal-Wallis test was used to detect significant differences among four groups. \* $P < 0.05$ , \*\* $P < 0.01$ , \*\*\* $P < 0.001$ . d) PCoA plot based on

binary\_jaccard distance showing microbiota diversity among these four groups. **e)** Cladogram generated using LEfSe analysis. Red: increased abundance in the control group. Green: increased abundance in the IG10 group. Blue: increased abundance in the IG100 group. Yellow: increased abundance in the IG1000 group. **f)** LDA scores of the microbiota among these four groups at different taxonomic levels using LEfSe analysis. LDA score  $>3$  or  $<-3$  represents bacteria taxa that are significantly enriched in the HT group (green) or control group (red) ( $P < 0.05$ ). N=12 for CON group, 10 for IG10 group, 10 for IG100 group, and 10 for IG1000 group.

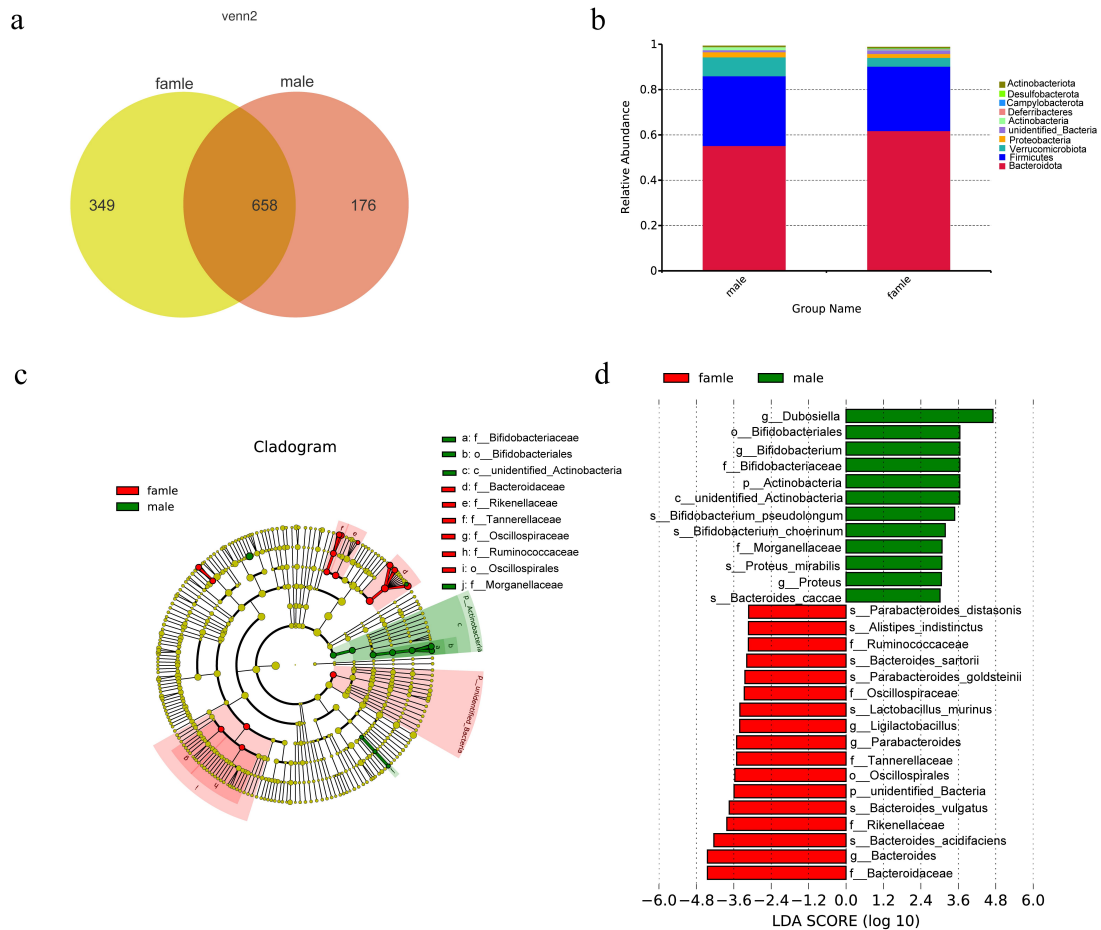

**Fig S5. a)** The Venn diagram illustrates the overlap of OTUs in gut microbiota between different sex groups of mice with HT. **b)** Phylum level comparison of fecal microbiota between male and female mice groups with HT. **c)** LDA scores of the

microbiota in male and female groups with HT at different taxonomic levels using LEfSe analysis. LDA score  $>3$  or  $<3$  represents bacteria taxa that are significantly enriched in the male group (green) or female group (red) ( $P < 0.05$ ). **d**) Cladogram generated using LEfSe analysis. Red: increased abundance in the female group. Green: increased abundance in the male group.

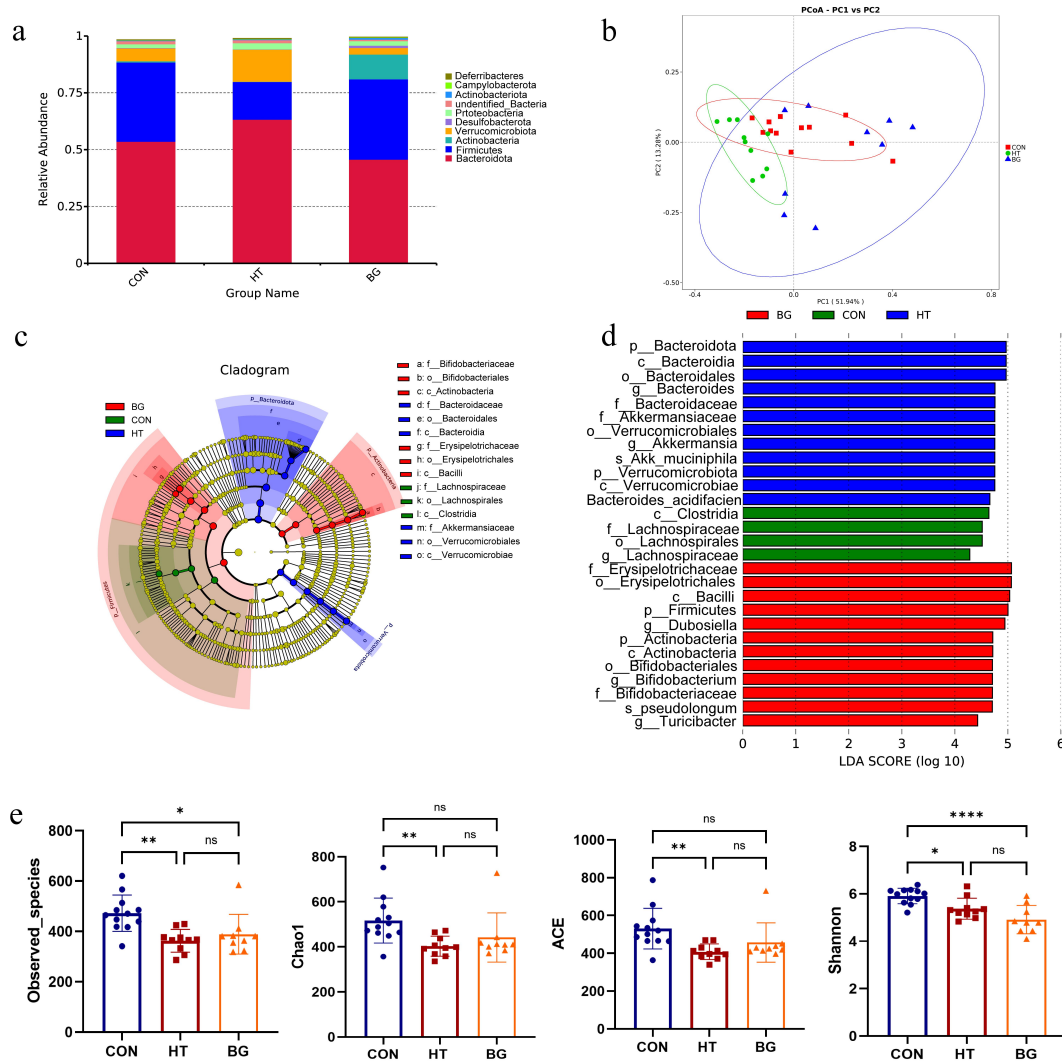

**Fig S6.** **a)** Phylum level comparison of relative abundance fecal microbiota among healthy, HT, and butyrate groups. **b)** PCoA plot based on binary\_jaccard distance showing microbiota diversity among these three groups. **c)** Cladogram generated using LEfSe analysis. Red: increased abundance in the BG group. Green: increased

abundance in the CON group. Blue: increased abundance in the HT group. **d)** Cladogram generated using LefSe analysis. LDA scores of the microbiota among three groups at different taxonomic levels using LefSe analysis. LDA score  $>3$  or  $<-3$  represents bacteria taxa that are significantly enriched ( $P < 0.05$ ). **e)** The  $\alpha$  diversity indices (Chao 1, ACE, Shannon, and Simpson indexes) of the microbiota among these three groups. N=12, 10, 9 for CON, HT, and BG groups respectively.

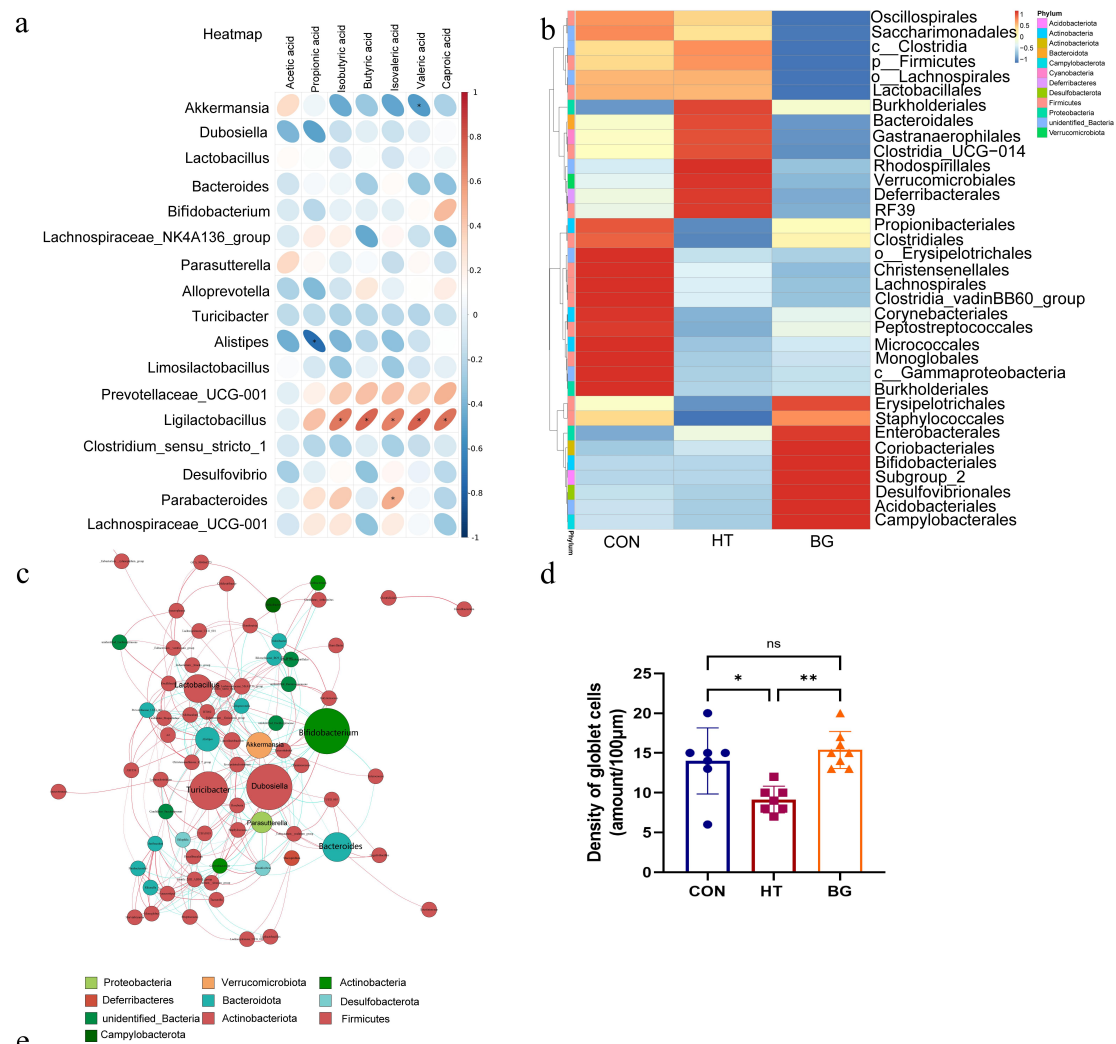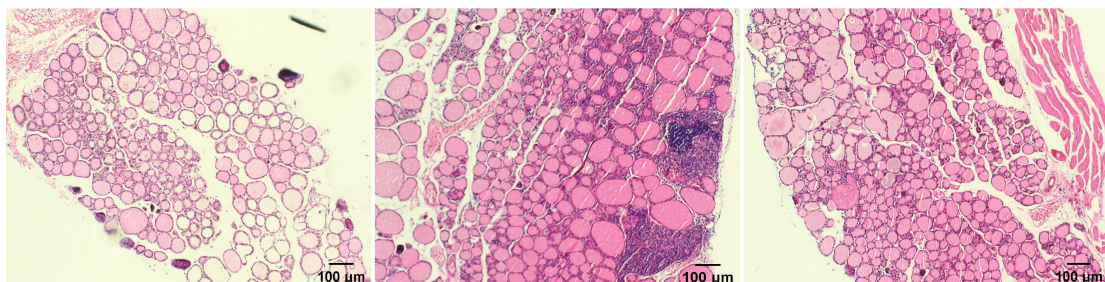



**Fig S7.a)** Heatmap of correlations between the significantly changed gut microbiota and 7 SCFA metabolites in HT mice at genus level. The color bar with numbers indicates the correlation coefficients. **b)** Heatmap based on the abundance of the first 35 order among these three groups. **c)** Network of the relative abundance of butyrate group at genus level. The size of the node represents the relative abundance of microbiota, the color of the node represents different genus. **d)** Histogram presenting the statistical result of goblet cell density. The data are expressed as the mean  $\pm$  standard deviation. One-way ANOVA was used to detect significant differences. \*  $P < 0.05$ , \*\*  $P < 0.01$ . N=7, 7, 8 for CON, HT, and BG groups respectively. **e)** Thyroid inflammation was determined according to the lymphocyte infiltration area using HE staining of the mice's thyroid gland. Scale bar: 100  $\mu\text{m}$ .

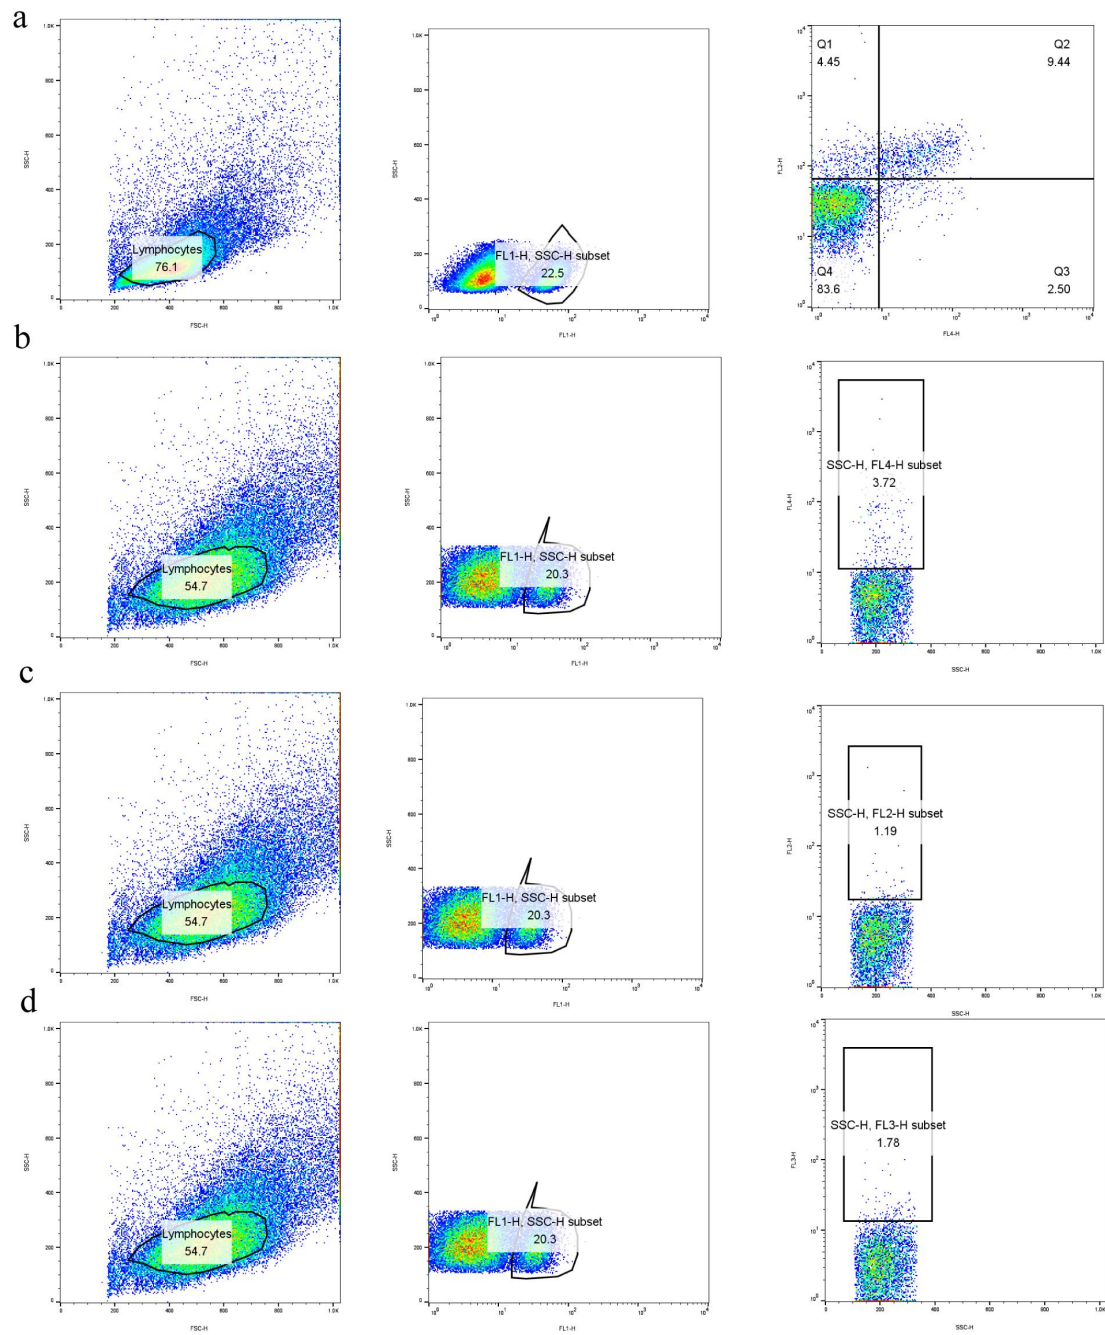

**Fig S8.** The flow cytometer gating strategy for **a)** CD4+CD25+FOXP3+ cells (Treg), **b)** CD4+ IFN<sup>+</sup> cells (Th1), **c)** CD4+ IL4+ T cells (Th2), **d)** CD4+ IL17+ cells (Th17).
