# Supplementary material for: Effects of iodine intake on gut microbiota and gut metabolites in Hashimoto thyroiditis-diseased humans and mice
Source: PubMed Central journal article supplement (PMC10824742; doi:10.1038/s42003-024-05813-6), 2024-01-29
Supplement: 42003_2024_5813_MOESM2_ESM.pdf [file 42003_2024_5813_MOESM2_ESM.pdf]

## **Description of Additional Supplementary Files**

**File name:** Supplementary Data 1

**Description:** Targeted metabolomic analysis of SCFAs and microbiota data used in the figures.

**File name:** Supplementary Data 2

**Description:** Source data of clinical characteristics of patients with HT and healthy control groups used in the study.

**File name:** Supplementary Data 3

**Description:** The source data for Fig. 6a-h, Fig. S3f, Fig. S4c, Fig. S6e, Fig. S7d.
